# Supplementary material for: Genome‐wide association study identifies gastric cancer susceptibility loci at 12q24.11‐12 and 20q11.21
Source: PubMed Central journal article supplement — Cancer Sci. 2018 Oct 31;109(12):4015–24. doi: 10.1111/cas.13815 (PMC6272082; doi:10.1111/cas.13815), 2018-10-31
Supplement: CAS-109-4015-s001.pdf [file CAS-109-4015-s001.pdf]

# Figure S1

## Screening step

Case: 6,171  
Control: 27,178

Typing  
(Illumina OmniExpress Exome)

951,117 SNPs

Quality check 1 (Call rate  $\geq 0.99$ , MAF  $\geq 0.01$ , HWE  $\geq 1 \times 10^{-6}$ )

511,850 SNPs

Imputation  
(hg19/1000 genomes Mar 2012 ASN)

Quality check 2 ( $R^2 \geq 0.4$ )

6,573,681 SNPs

$P < 1 \times 10^{-6}$

1,293 SNPs  
(16 regions)

$r^2 < 0.2$

## Replication step

Replication 1  
Case: 1,374  
Control: 2,049

Replication 2  
Case: 1,332  
Control: 3,205

Replication 3  
Case: 2,630  
Control: 6,472

3 SNPs  
(3 reported regions)

$P_{\text{meta}} < 5 \times 10^{-8}$

15 SNPs  
(13 unreported regions)

Quality check 3 ( $P_{\text{het}} > 0.05$ )  
 $P_{\text{meta}} < 5 \times 10^{-8}$

3 SNPs  
(3 unreported regions)

$P_{\text{meta}} < 5 \times 10^{-8}$

Figure S1 Scheme for study design and screening results.

Figure S2

rs117950304

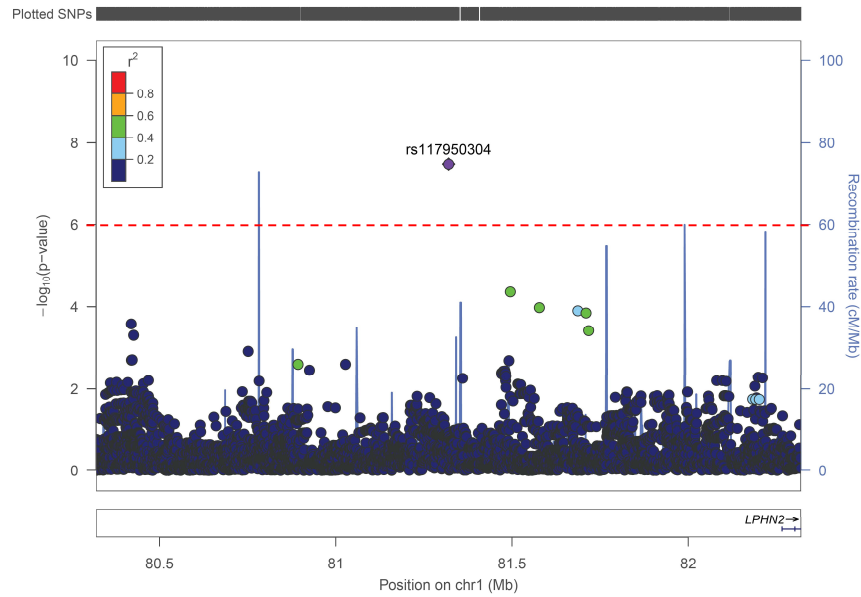

rs1057941

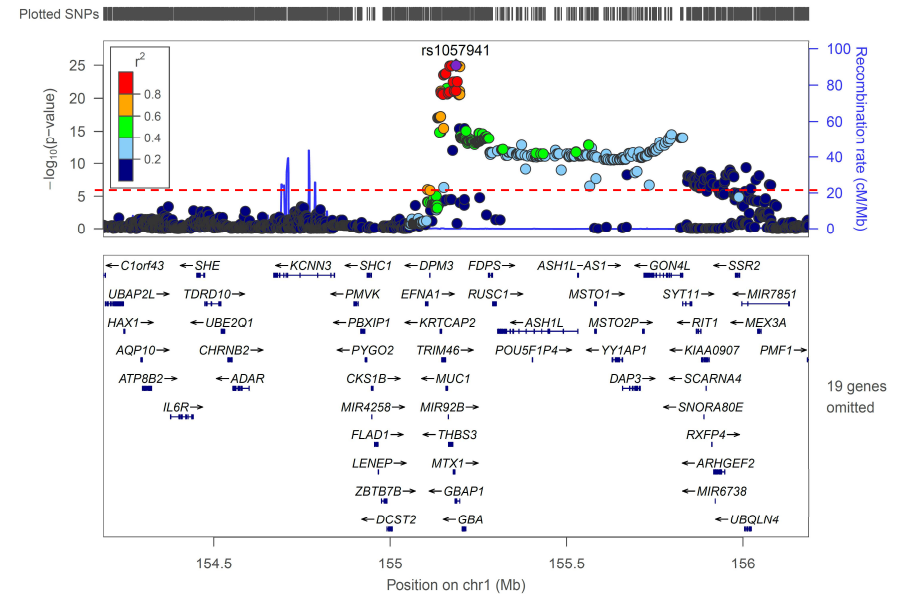

rs78390645

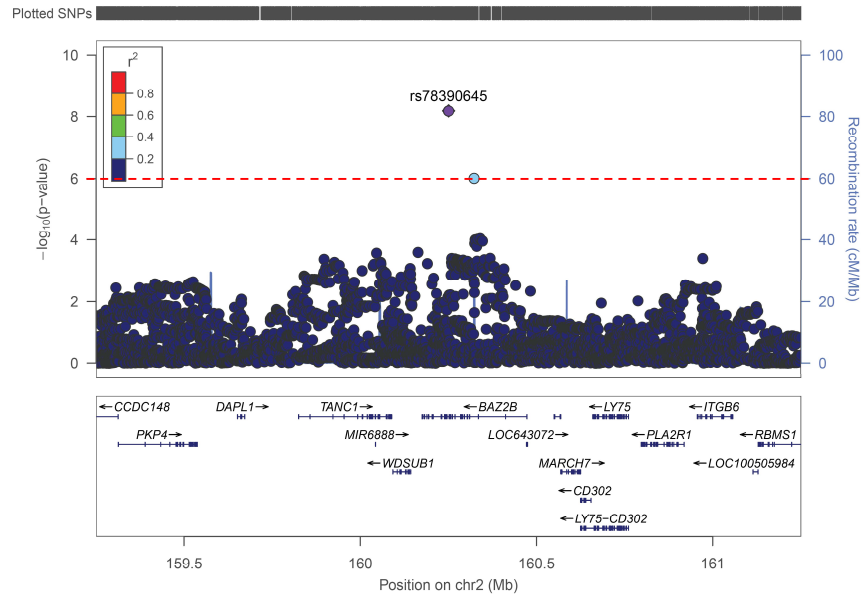

rs11940071

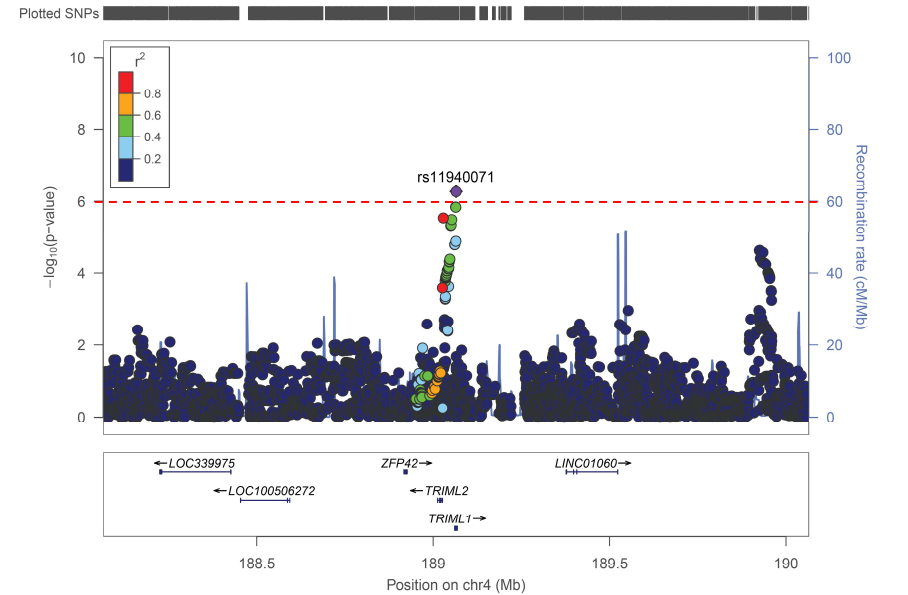

# rs6553297

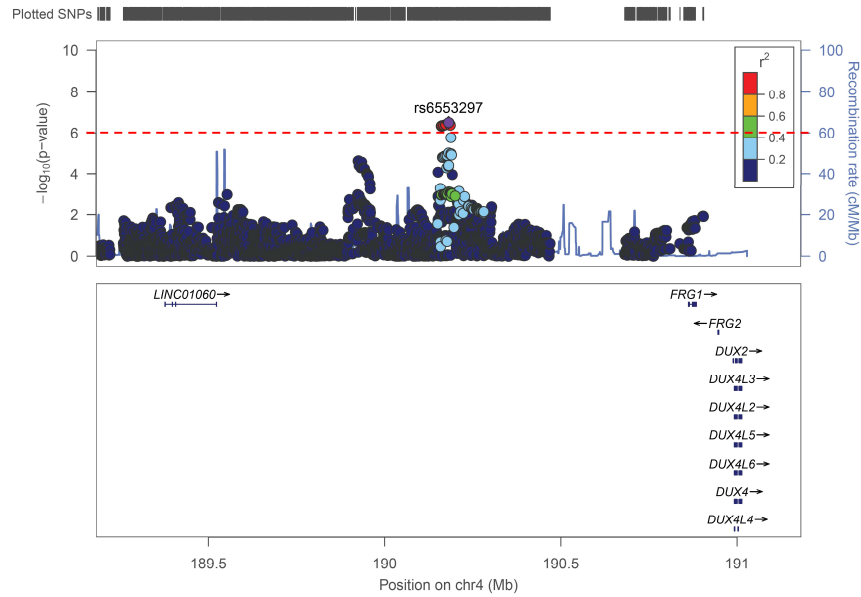

# rs13361707

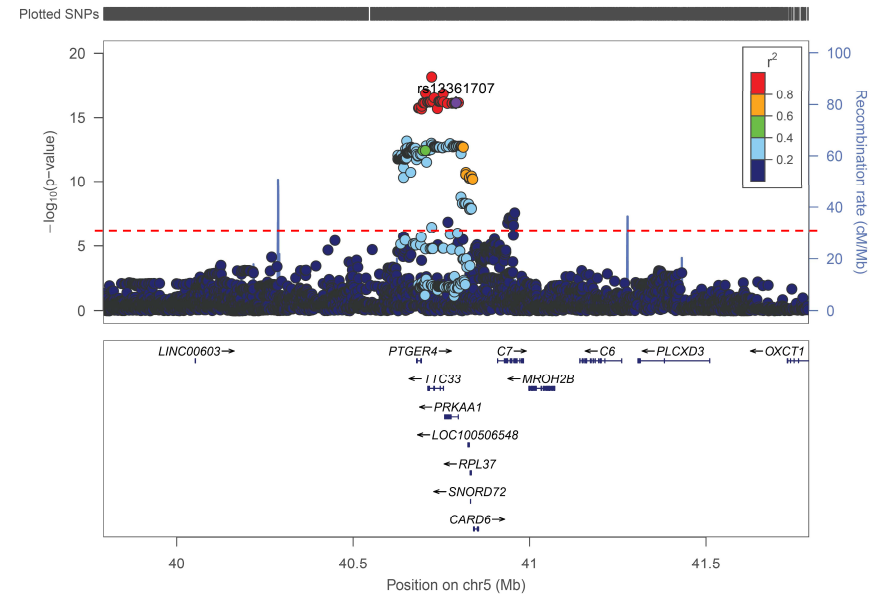

# rs2545790

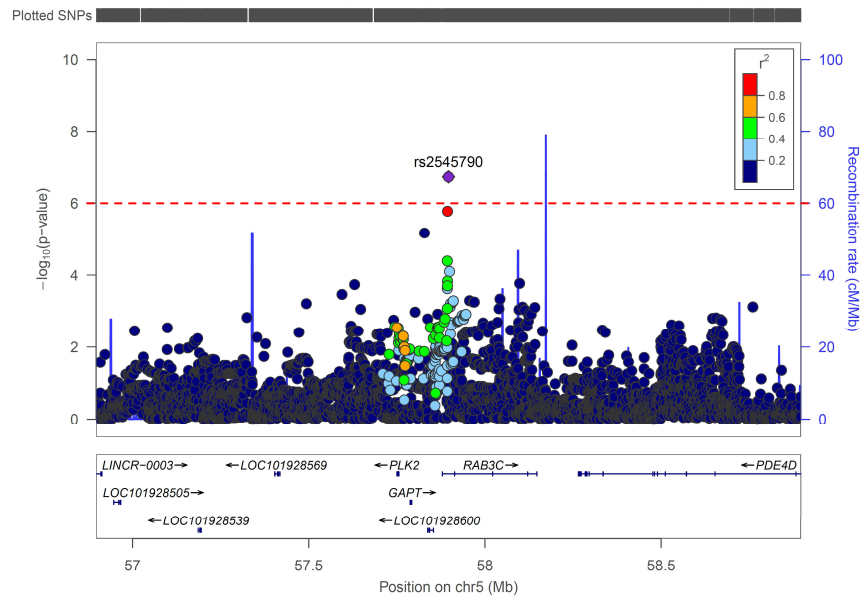

# rs59043558

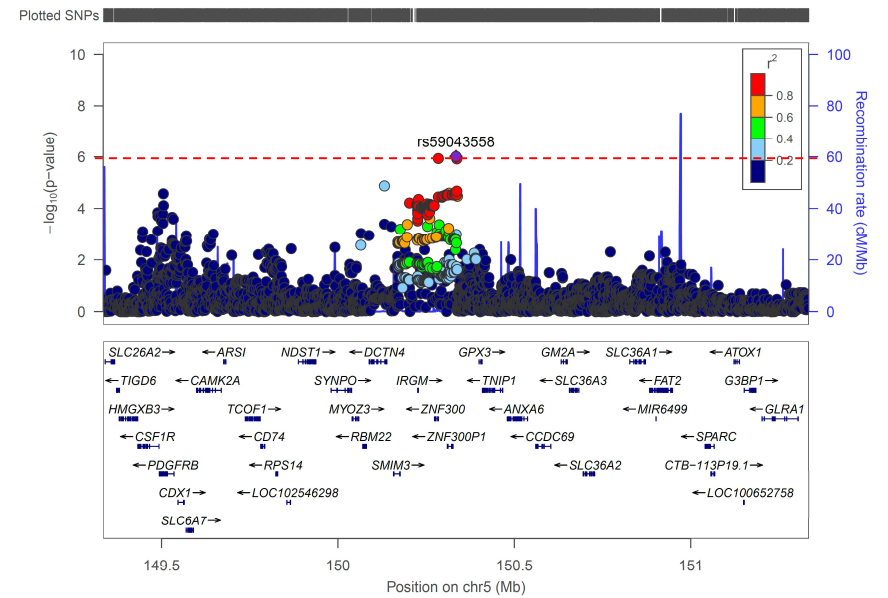

# rs76868863

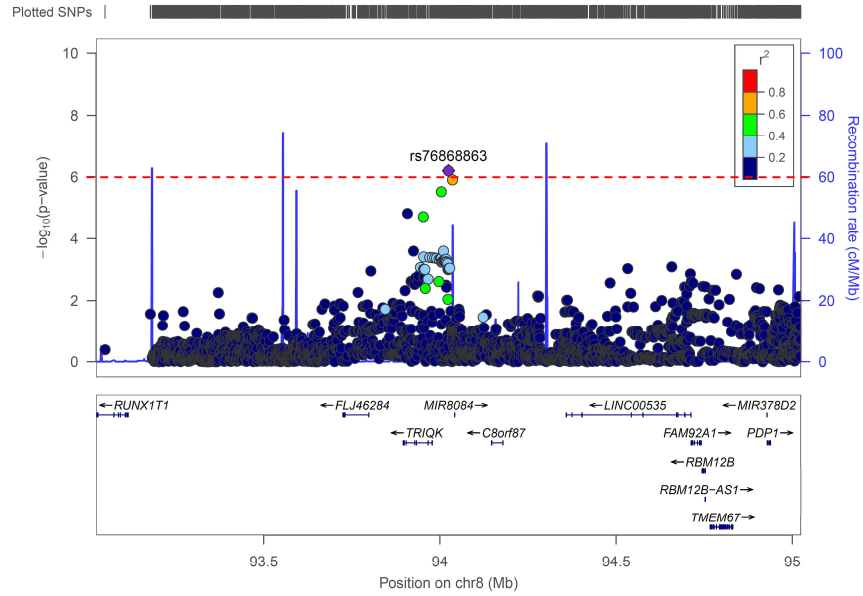

# rs2294008

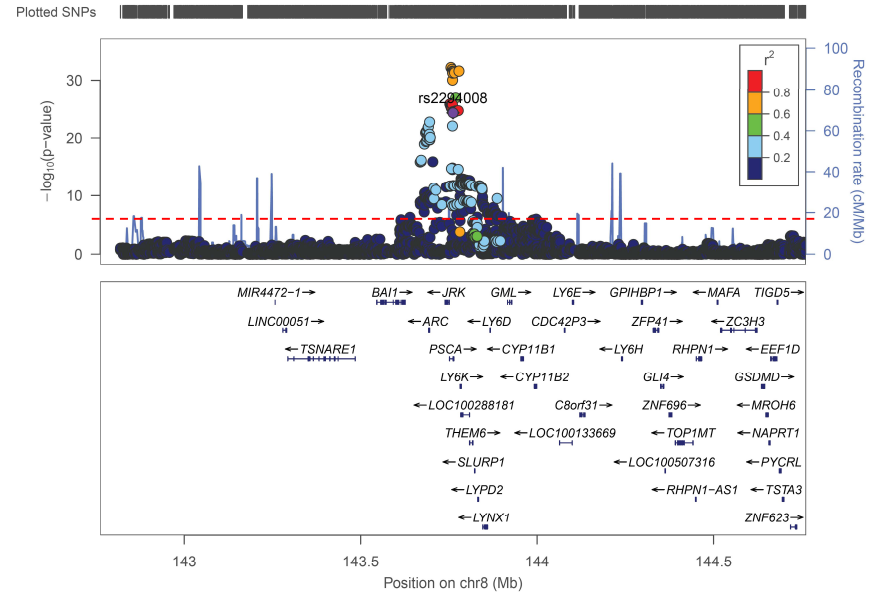

# rs7849280

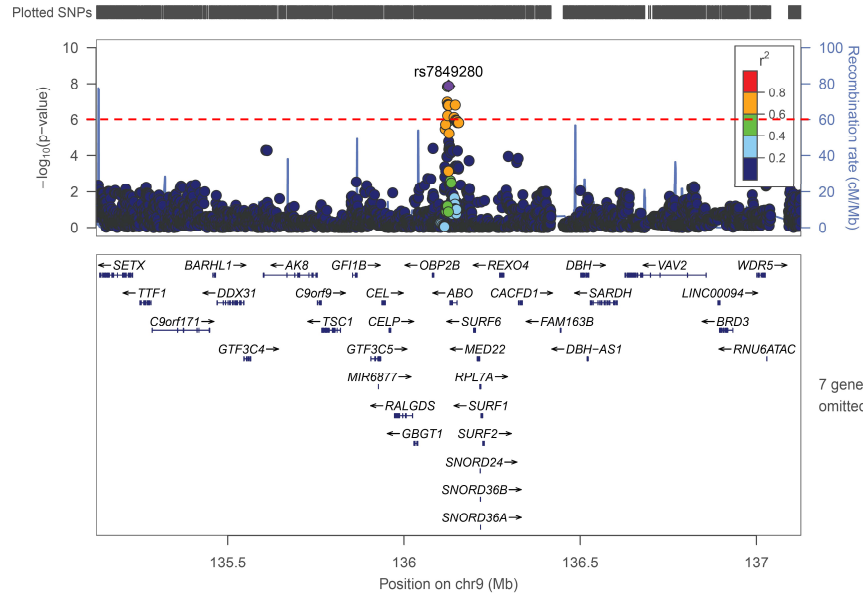

# rs11065734

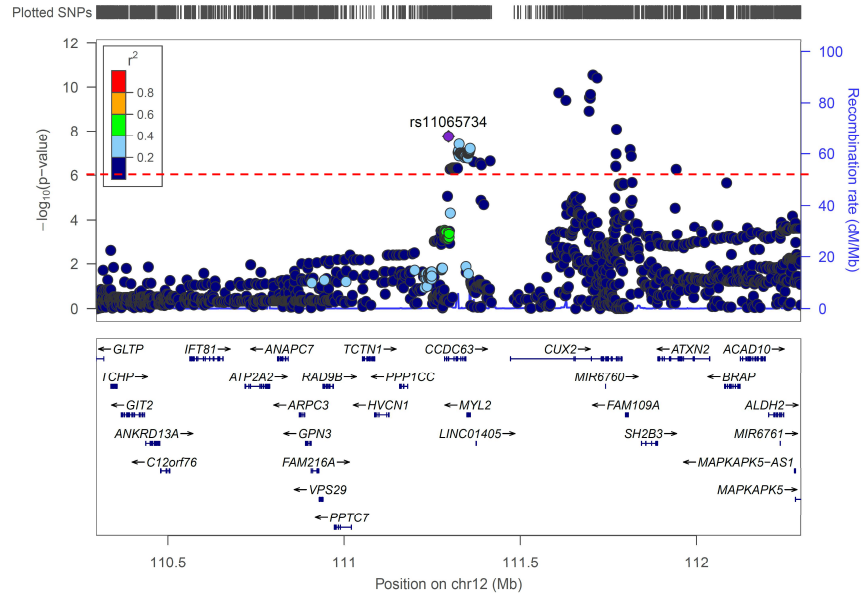

# rs3858704

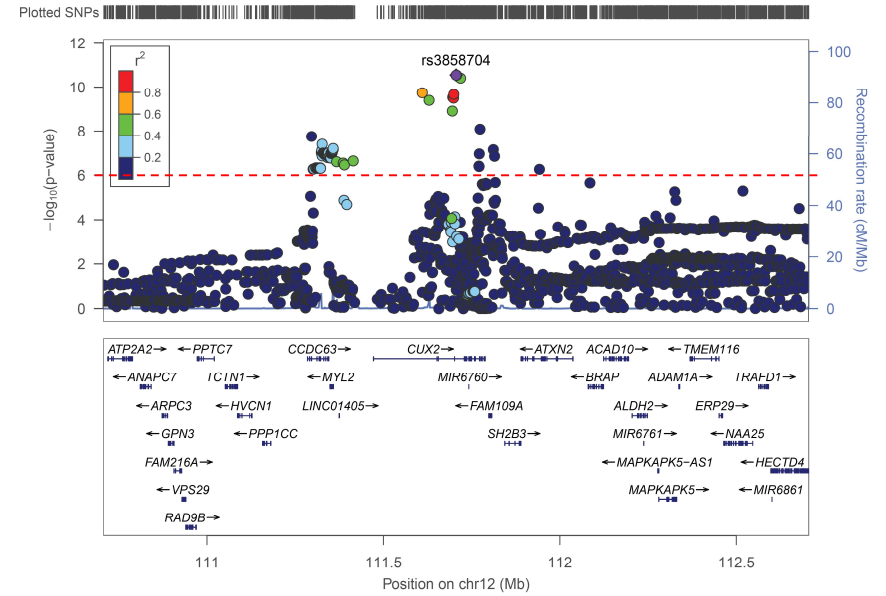

# rs6490061

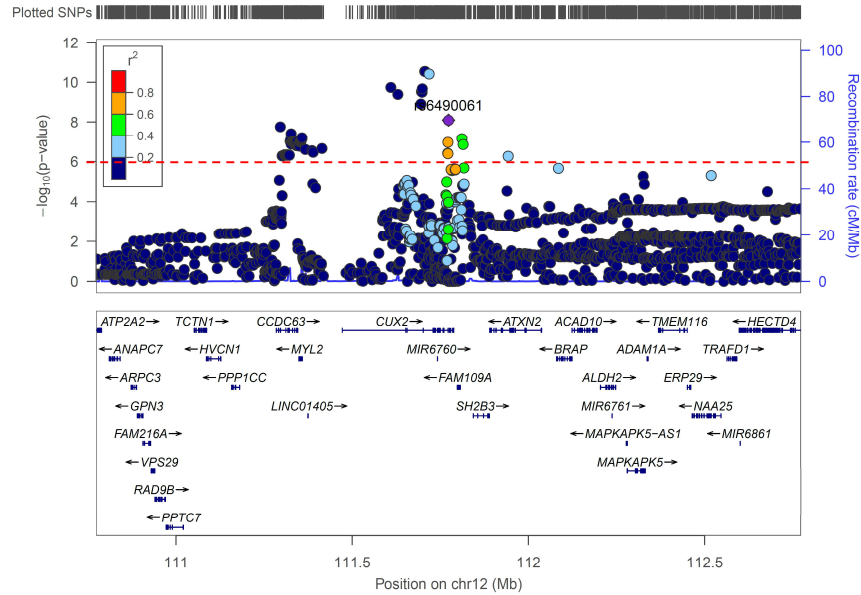

# rs11066491

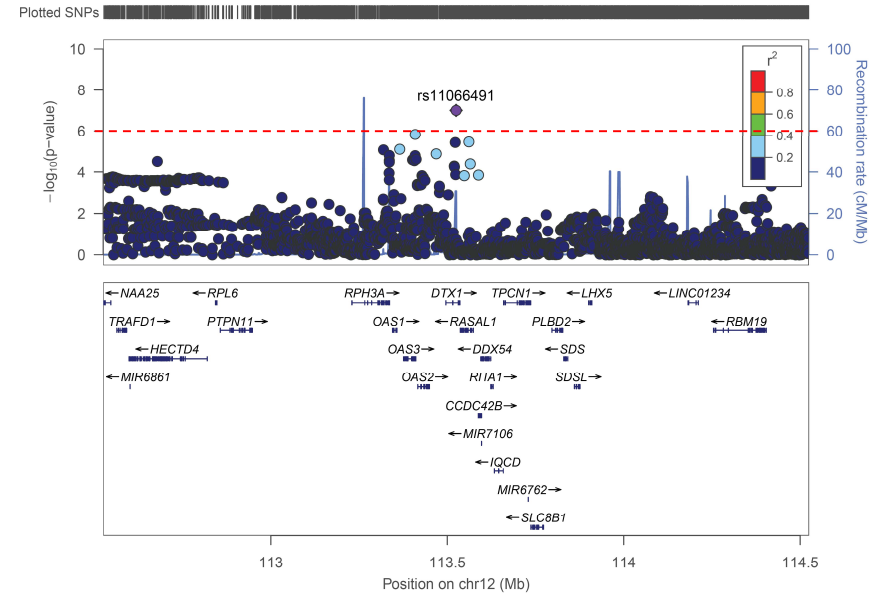

### rs9517698

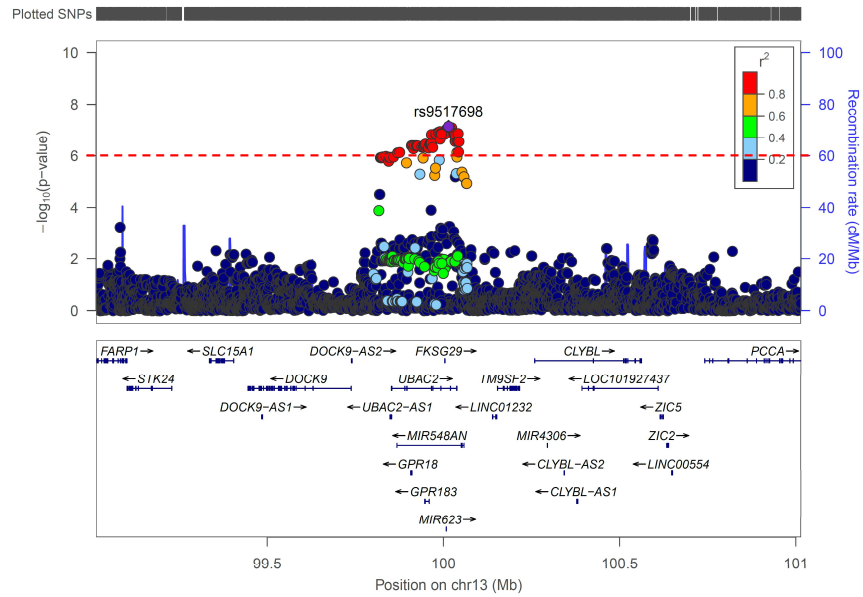

### rs6117917

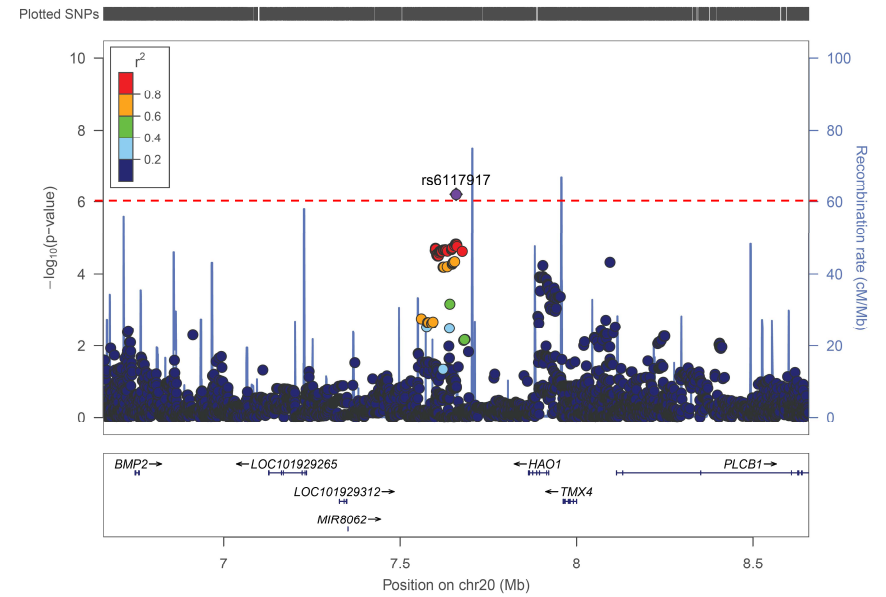

### rs2376549

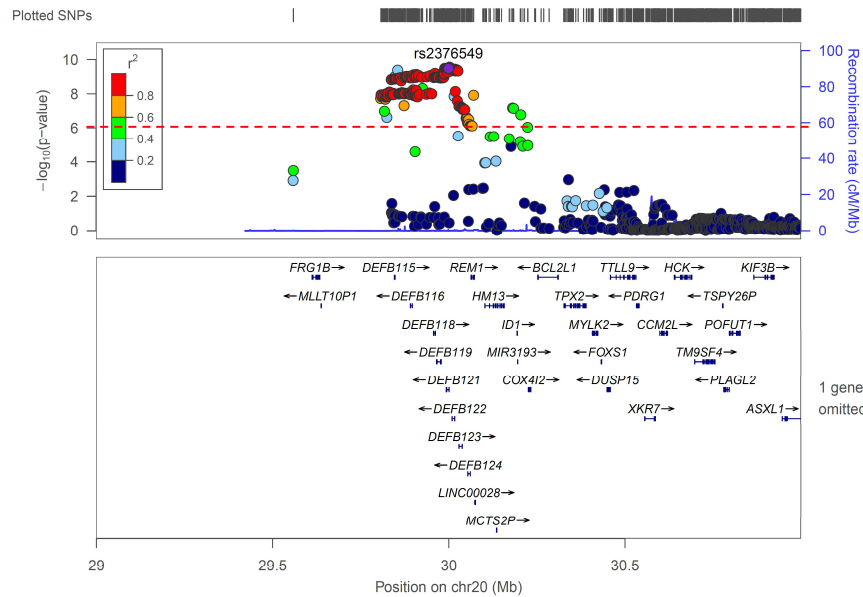

**Figure S2** Regional plots of 16 candidate loci for gastric cancer. The  $-\log_{10} P$  values from the screening stage in reported three loci (red) and novel 13 loci (black) are shown. Estimated recombination rates (from 1000 Genomes) are plotted in blue. The SNPs are color-coded to reflect their correlation with genotyped SNPs. Pairwise  $r^2$  values are from 1000 Genomes East Asian data (March 2012 release). Genes, position of exons and direction of transcription from UCSC genome browser (genome.ucsc.edu) are noted. Plots were generated using LocusZoom (<http://csg.sph.umich.edu/locuszoom>).

**Figure S3**

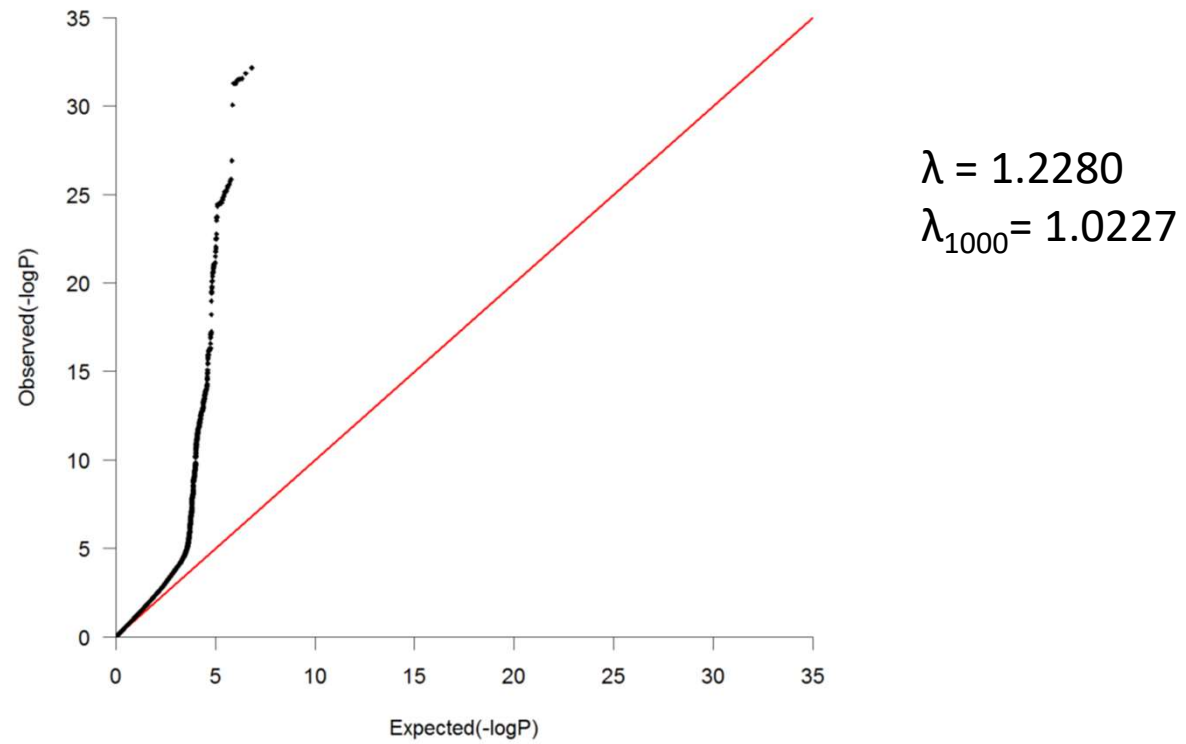

**Figure S3** Quantile quantile plot for imputed GWAS of gastric cancer in the Japanese population.

## Figure S4

rs7849280 (9q34.2)

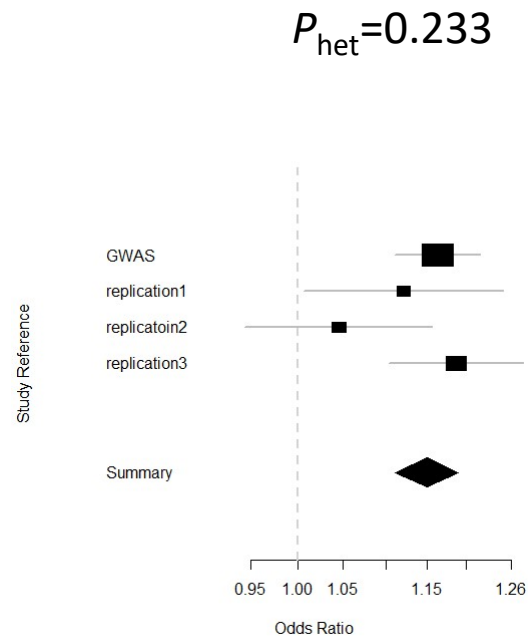

rs6490061 (12q24.11-12)

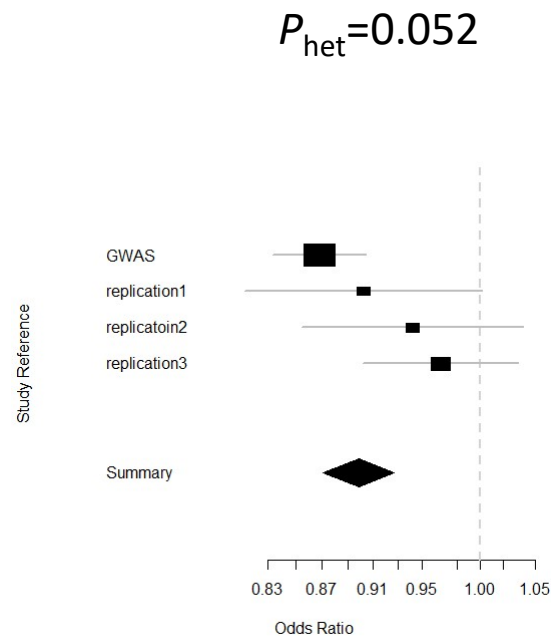

rs2376549 (20q11.21)

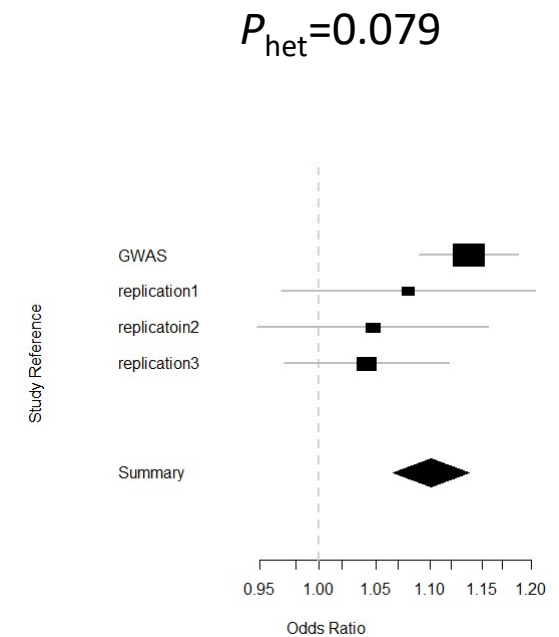

**Figure S4** Forest plots for risk variants in the three novel gastric cancer risk loci. Plots show the association estimates (odds ratios) and 95% confidence intervals for the screening stage and three replication studies presented as bars. The association estimate and confidence interval for the meta-analysis combining screening and three replication results are shown as a diamond. The size of the square box is proportional to the number of cases and controls in each study site. Heterogeneity across the two stages was examined using the Cochran Q test.



## Figure S5

rs1057941 (1q22)

$P_{\text{het}}=0.170$

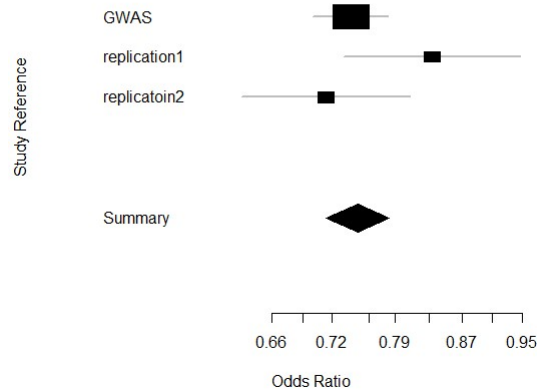

rs13361707 (5p13.1)

$P_{\text{het}}=0.291$

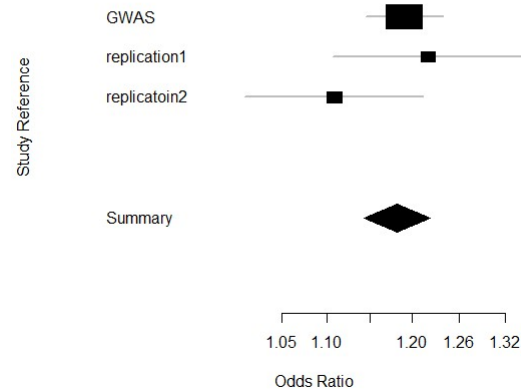

rs2294008 (8q24.3)

$P_{\text{het}}=0.003$

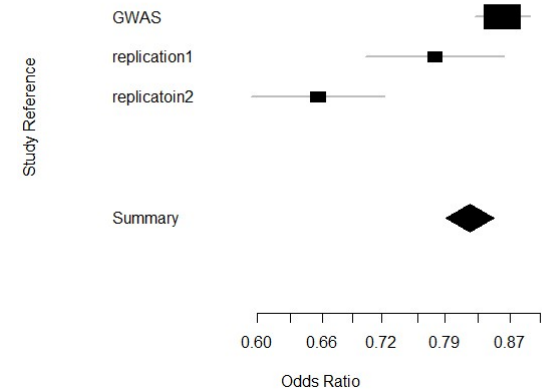

**Figure S5** Forest plots for risk variants in the three previously identified gastric cancer risk loci. Plots show the association estimates (odds ratios) and 95% confidence intervals for the screening stage and two replication studies presented as bars. The association estimate and confidence interval for the meta-analysis combining screening and two replication results are shown as a diamond. The size of the square box is proportional to the number of cases and controls in each study site. Heterogeneity across the two stages was examined using the Cochran Q test.

**Figure S6**

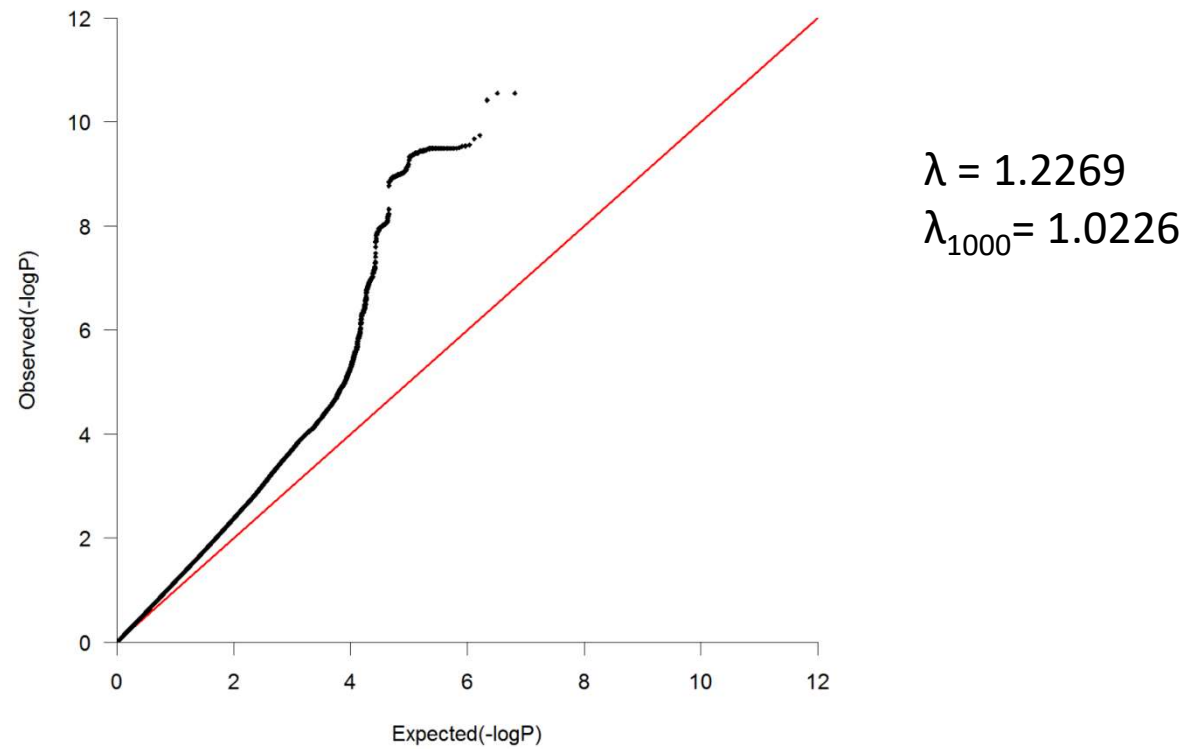

**Figure S6** Quantile quantile plot for imputed GWAS of gastric cancer in the Japanese population excluding three known loci; Chr1 (rs2070803 $\pm$ 1Mb), Chr5 (rs13361707 $\pm$ 1Mb), Chr8 (rs2294008 $\pm$ 1Mb)).

**Figure S7**

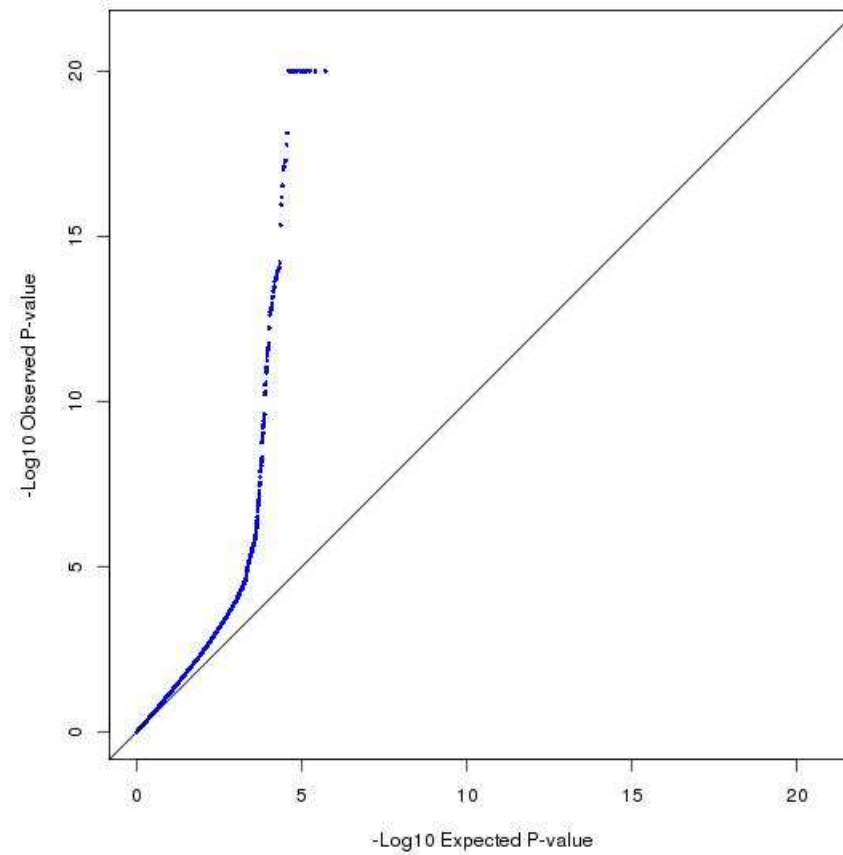

$\lambda = 1.2388$

**Figure S7** Quantile quantile plot for GWAS of gastric cancer in the Japanese population using 511,850 genotyped SNPs.

**Figure S8**

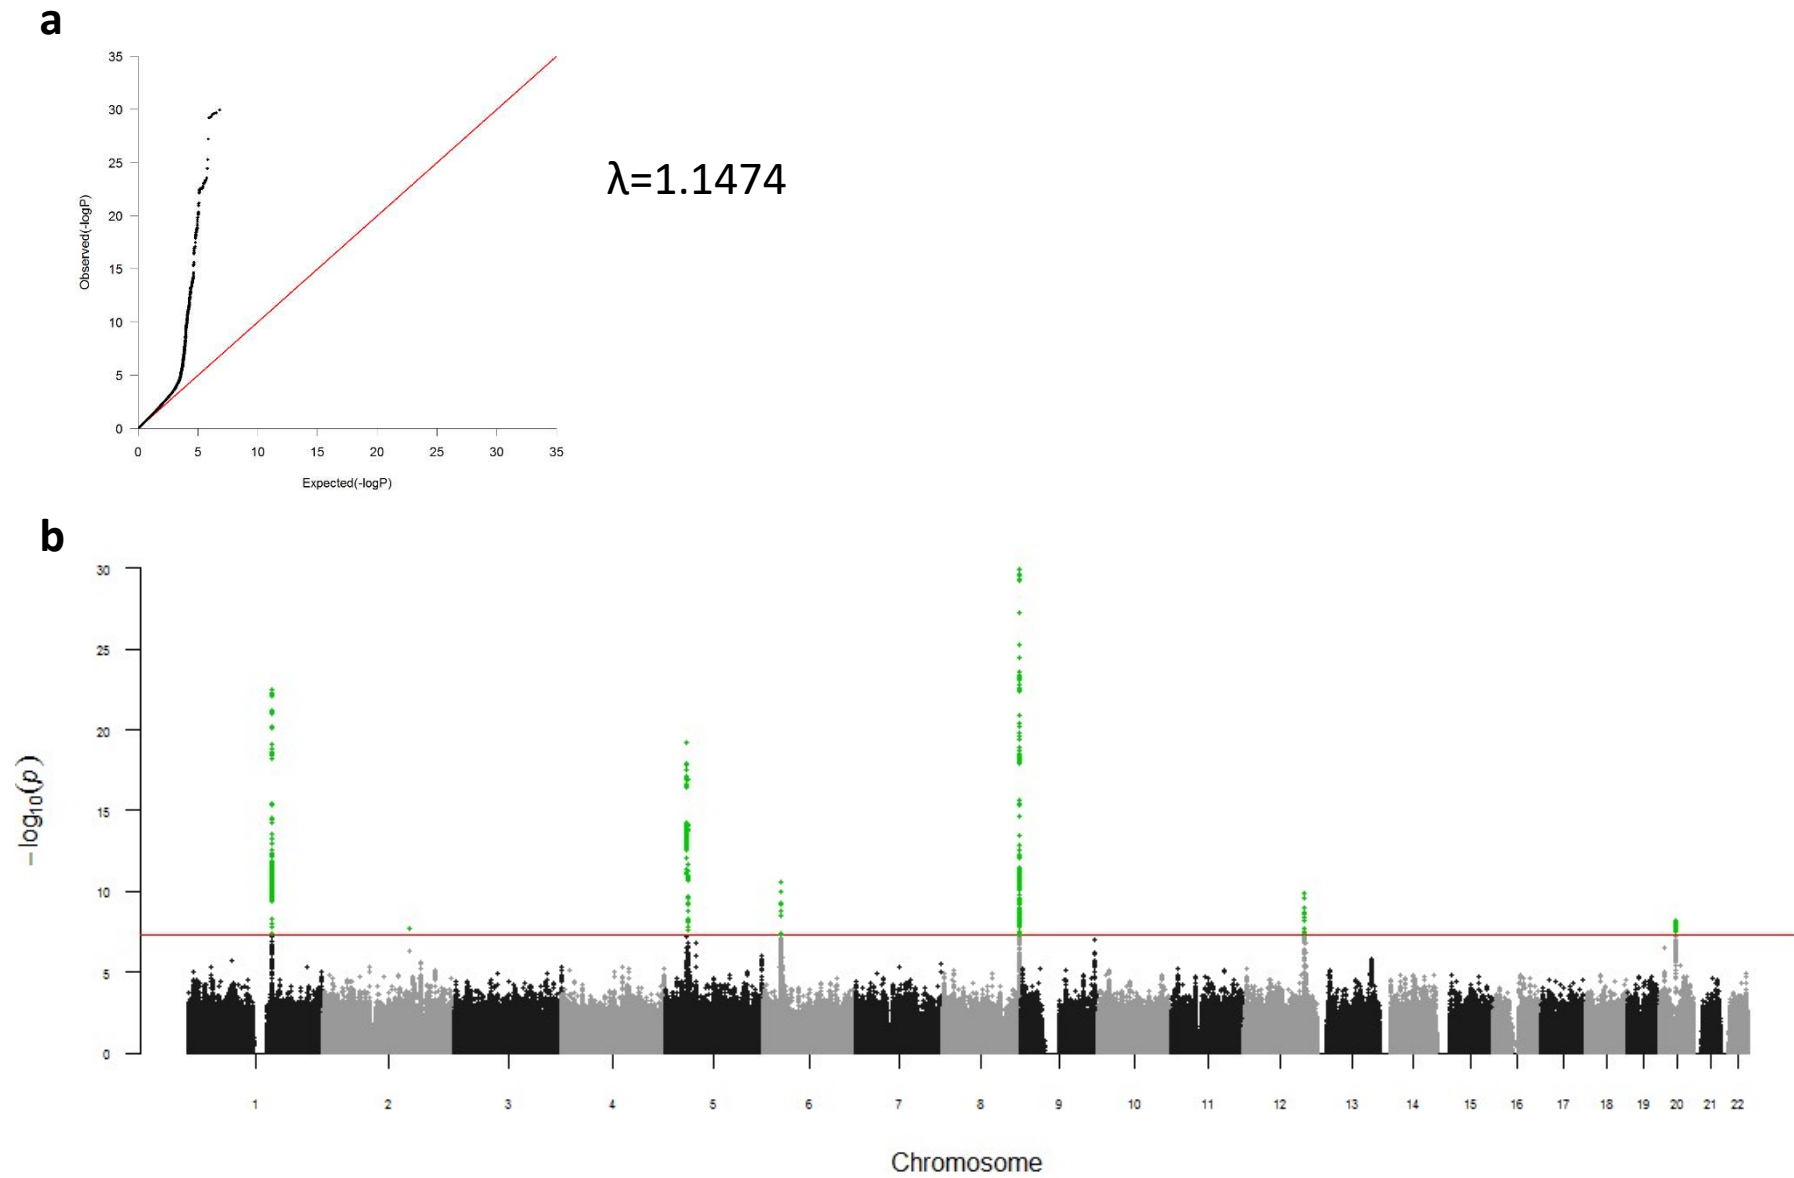

**Figure S8** GWAS of gastric cancer using 10PC as covariates. (a) Quantile quantile plot for imputed GWAS of gastric cancer in the Japanese population. (b) Manhattan plot showing the genome-wide P values of association. The red horizontal line represents the genome-wide significance threshold of  $P = 5.0 \times 10^{-8}$ .

# Figure S9

a

rs1057941 (1q22)

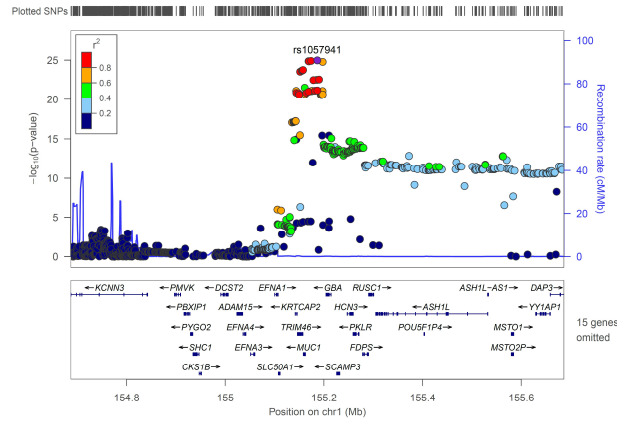

before condition

rs13361707 (5p13.1)

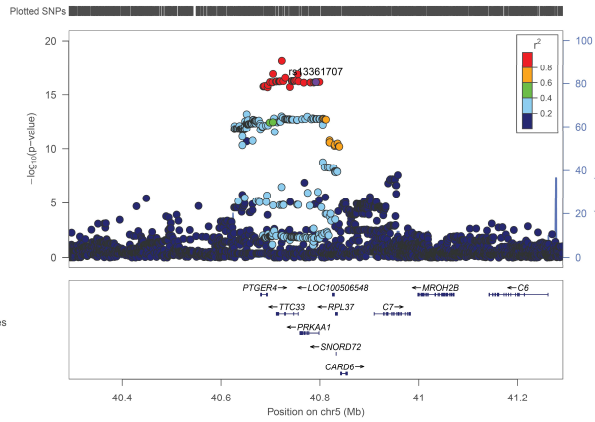

before condition

rs2294008 (8q24.3)

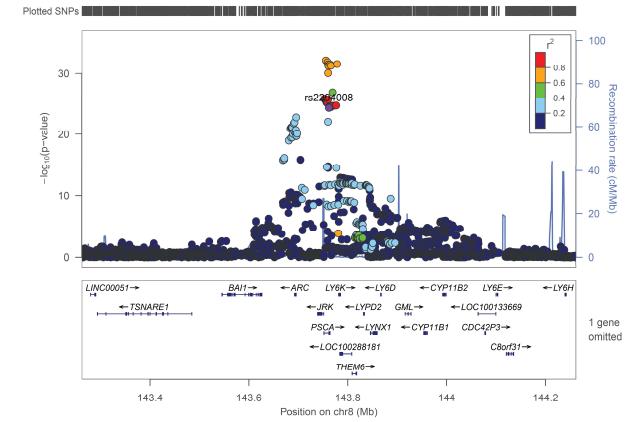

before condition

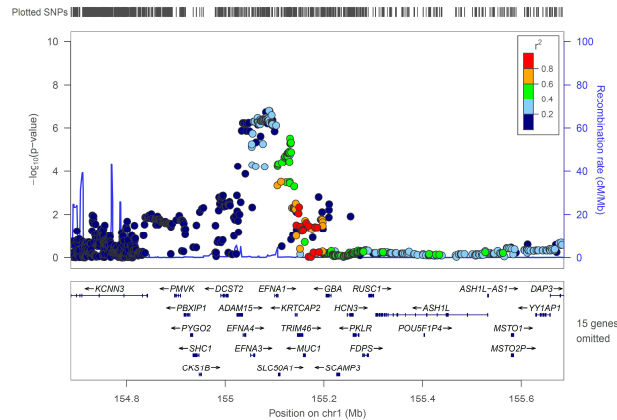

after condition

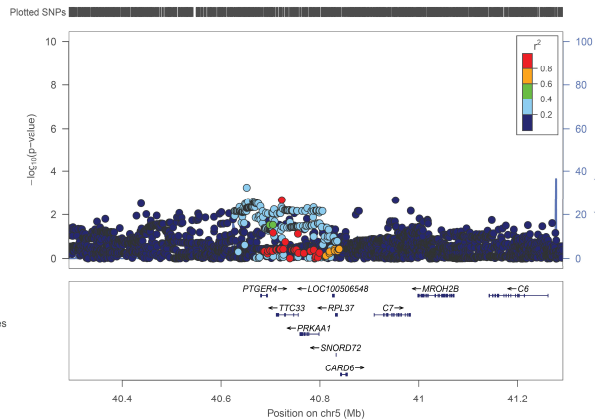

after condition

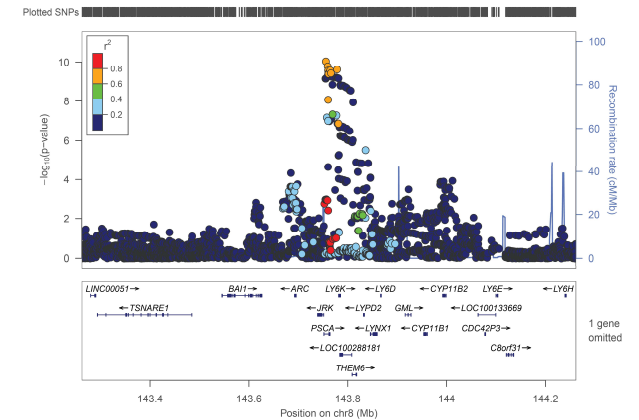

after condition

**b**

rs7849280 (9q34.2)

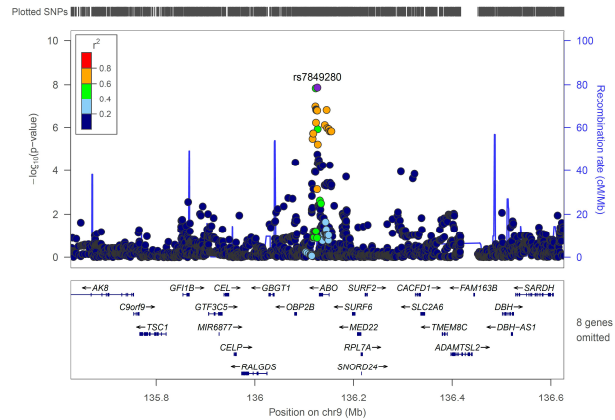

before condition

rs6490061 (12q24.11-12)

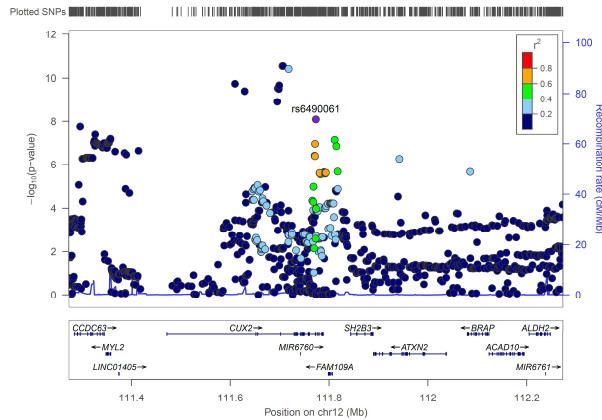

before condition

rs2376549 (20q11.21)

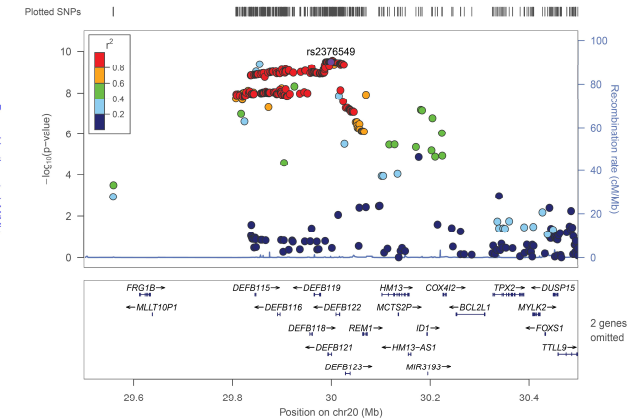

before condition

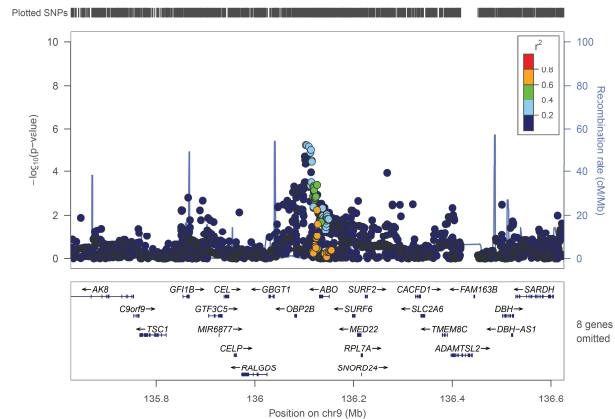

after condition

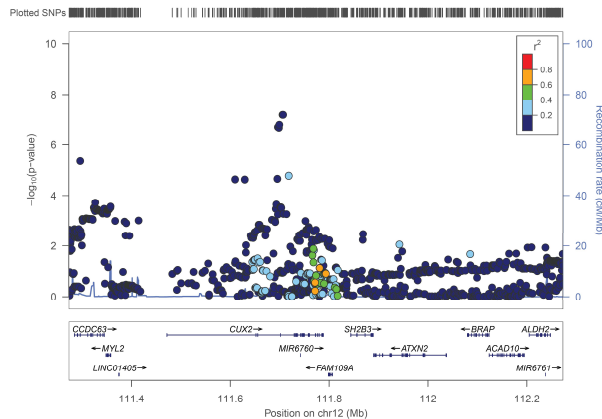

after condition

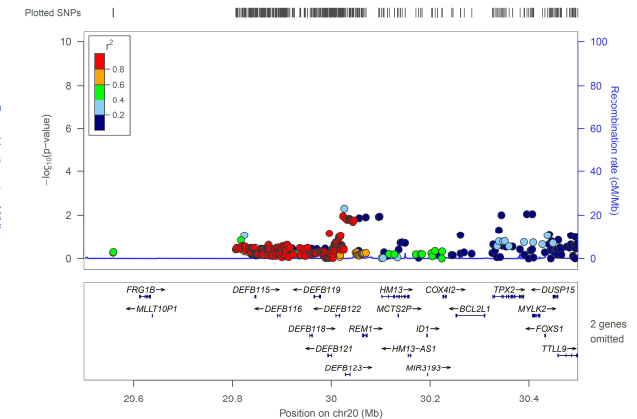

after condition

**Figure S9** Regional plots of six loci for gastric cancer before and after condition. The  $-\log_{10} P$  values from the screening stage in reported three loci (a) and novel three loci (b) are shown. Upper and lower panels are before and after condition respectively using SNPs shown in each panel. Estimated recombination rates (from 1000 Genomes) are plotted in blue. The SNPs are color-coded to reflect their correlation with genotyped SNPs. Pairwise  $r^2$  values are from 1000 Genomes East Asian data (March 2012 release). Genes, position of exons and direction of transcription from UCSC genome browser (genome.ucsc.edu) are noted. Plots were generated using LocusZoom (<http://csg.sph.umich.edu/locuszoom>).

**Figure S10**

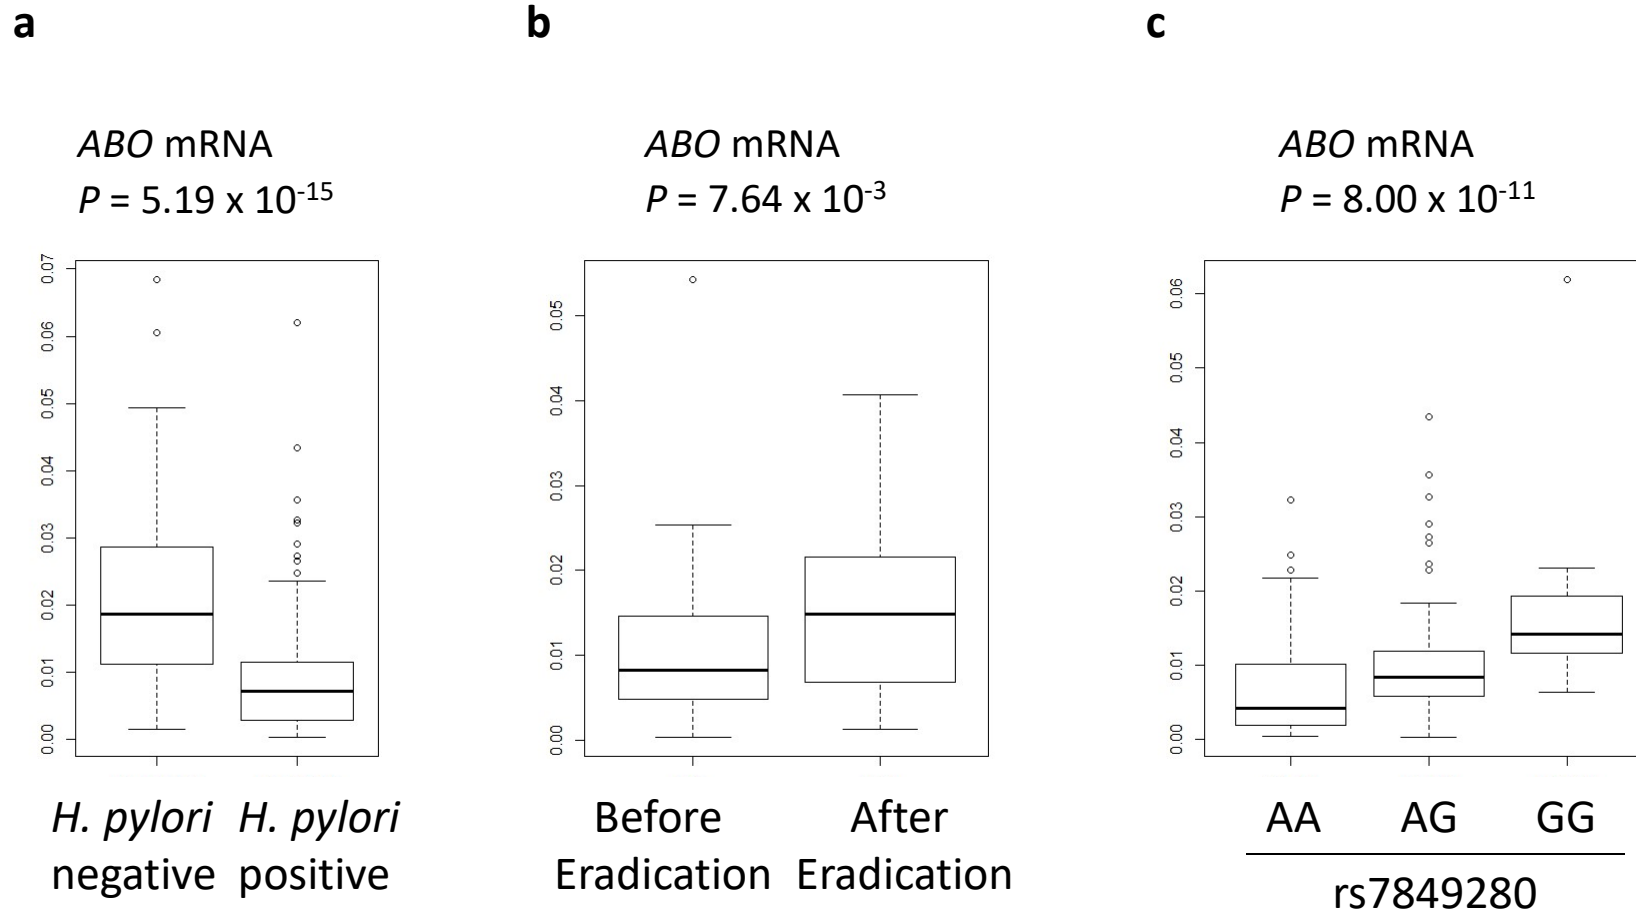

**Figure S10** The regulation of *ABO* expression by *H.pylori* infection. Box-plots indicate the qRT-PCR analysis of *ABO* mRNA levels in biopsy samples from background gastric mucosa. The vertical axis indicates the expression level of *ABO* normalized against *GAPDH* expression. Box = 25<sup>th</sup> and 75<sup>th</sup> percentiles; middle line in the box = median; whiskers = min value inside 25<sup>th</sup> percentile- 1.5\*inter quartile range and max value inside 75<sup>th</sup> percentile+ 1.5\*inter quartile range; points = outliers. **(a)** *ABO* mRNA in *H. pylori*-negative controls (n = 28) and *H. pylori*-infected patients (n = 280). **(b)** The *ABO* expression levels in each individual patients (n = 53) before and after *H. pylori* eradication. **(c)** Association of rs7849280 with *ABO* expression in *H. pylori*-infected patients (AA; n = 160, AG; n = 103, GG; n = 17). The *P* values were calculated by t-test **(a)(b)** or Kruskal-Wallis test **(c)**.

## Figure S11

**a**

*DEFB121* expression in testis

$P = 2.1 \times 10^{-8}$

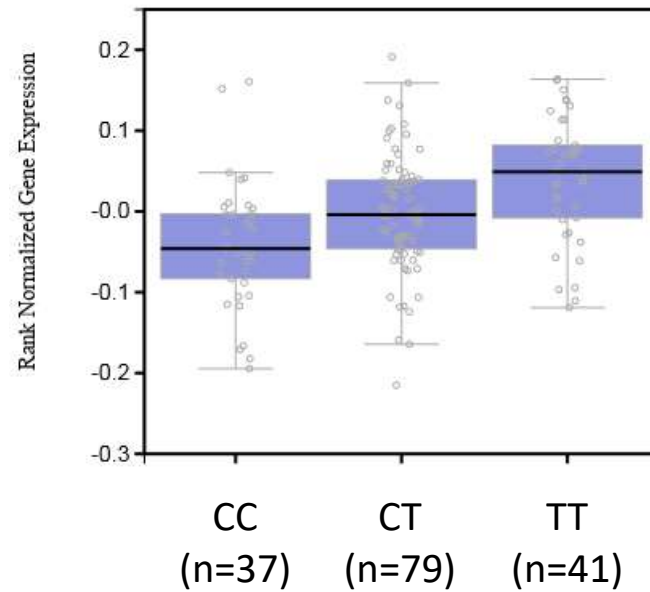

**b**

*DEFB119* expression in esophagus

$P = 2.1 \times 10^{-8}$

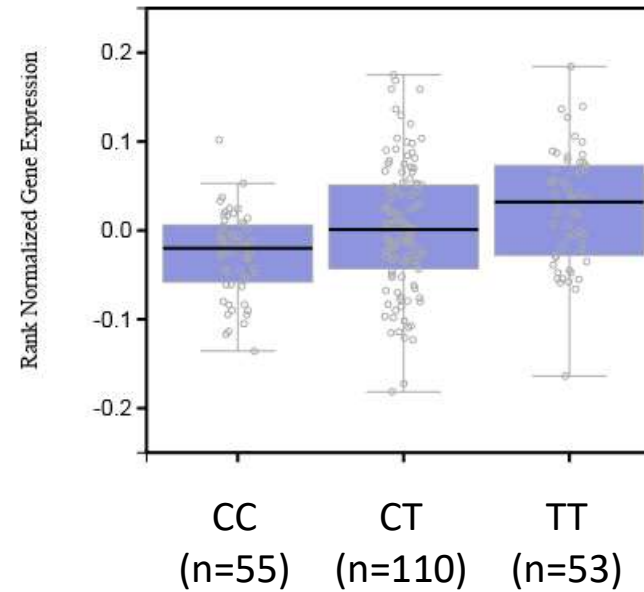

**Figure S11** eQTL analysis for rs2376549. Data were derived from GTEx portal (<https://www.gtexportal.org/home/>). (a) Association of rs2376549 with *DEFB121* expression in testis. (b) Association of rs2376549 with *DEFB119* expression in esophagus.



**Figure S12**

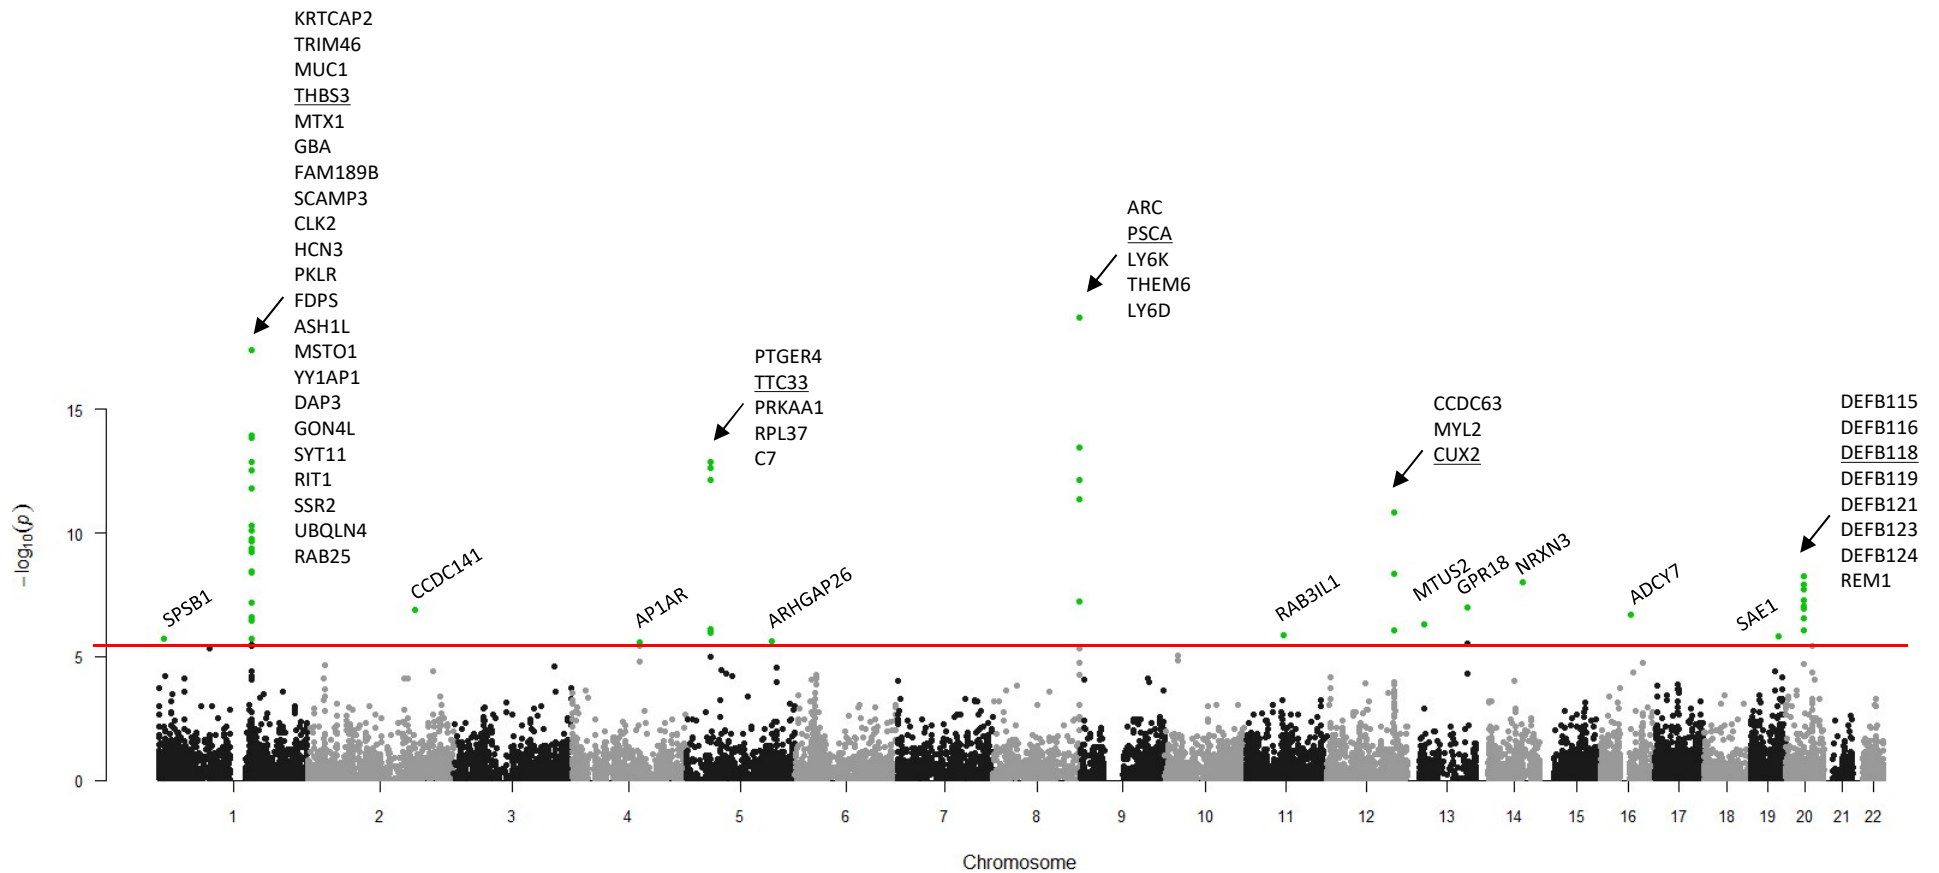

**Figure S12** Manhattan plot showing the genome-wide  $P$  values of association. The genome-wide  $P$ -values of 17,599 genes in 6,171 cases and 27,178 controls from the screening phase are shown. 53 genes are identified risk genes and underlined are most significant genes in each region. The red horizontal line represents the genome-wide significance threshold of  $P = 2.84 \times 10^{-6}$ .

**Figure S13**

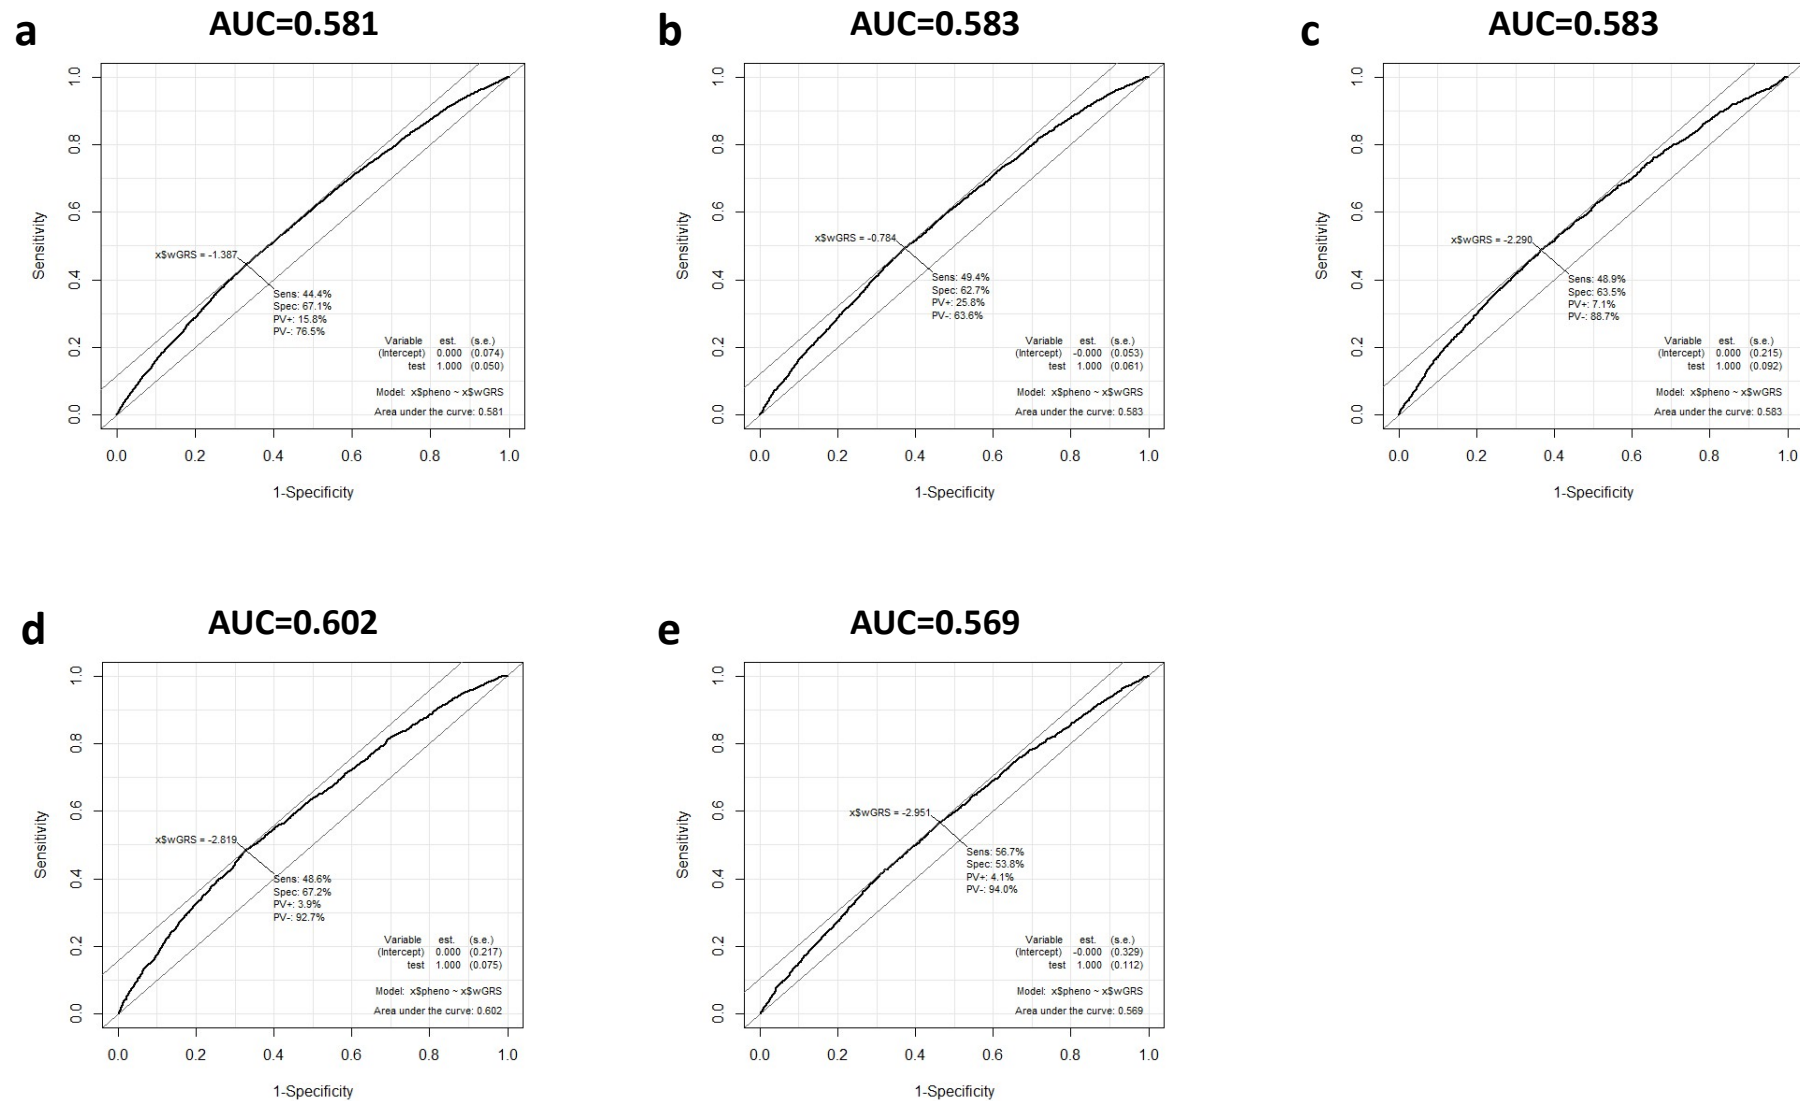

**Figure S13** Risk-prediction model using 6 significant SNPs. ROC curve for wGRS using 6 genetic variations (rs1057941, rs13361707, rs2294008, rs7849280, rs6490061, and rs2376549) at the screening stage. **(a)** Total gastric cancer, **(b)** Male gastric cancer, **(c)** Female Gastric cancer, **(d)** diffuse type gastric cancer, and **(e)** intestinal gastric cancer.
